# Supplementary material for: Utilizing spent mushroom substrate for rearing black soldier fly (Hermetia illucens) larvae: enhancing fertilizer efficiency and improving animal feed quality for sustainable agriculture
Source: PeerJ. 2025 Jun 19;13:e19590. doi: 10.7717/peerj.19590 (PMC12182726; doi:10.7717/peerj.19590)
Supplement: Supplemental Information 1 [file peerj-13-19590-s001.xlsx]

## Sheet: Beginning weight
the weight of 5 DOL
Number	Weight (g)
1	0.0502
2	0.0751
3	0.0617
4	0.0593
5	0.0737
6	0.0442
7	0.0555
8	0.0473
9	0.0568
10	0.0374
11	0.0444
12	0.0434
13	0.0572
14	0.0504
15	0.0571
16	0.0525
17	0.0478
18	0.0539
19	0.0528
20	0.0533
21	0.0387
22	0.0467
23	0.0412
24	0.0363
25	0.0786
26	0.0485
27	0.0361
28	0.0404
29	0.0567
30	0.0633
31	0.0405
32	0.0425
33	0.0532
34	0.0407
35	0.0387
36	0.0469
37	0.0398
38	0.041
39	0.0506
40	0.0602
41	0.0559
42	0.0481
43	0.0592
44	0.0642
45	0.0525
46	0.0476
47	0.0382
48	0.0354
49	0.0547
50	0.0493
ผลรวม	2.5197
ค่า SD	0.0101203

## Sheet: Weight
Treatment	replicate	Larval weight	Prepupal weight	Pupal weight
1	1	0.1909	0.1226	0.126
1	1	0.2454	0.1552	0.1301			Code for treatments
1	1	0.2005	0.1563	0.1014			1 = VEG
1	1	0.1188	0.1519	0.1221			2 = 15% LP-NF
1	1	0.1768	0.1096	0.1193			3 = 30%LP-NF
1	1	0.205	0.1314	0.0668			4 = 15% LP-F
1	1	0.19	0.1392	0.0983			5 = 30%LP-F
1	1	0.1299	0.1475	0.0972			6 = 15% PP-NF
1	1	0.1953	0.1305	0.119			7 = 30% PP-NF
1	1	0.1636	0.1523	0.1345			8 = 15% PP-F
1	1	0.168	0.1516	0.1113			9 = 30% PP-F
1	1	0.1635	0.1532	0.1227			10 = 15% AC-NF
1	1	0.2004	0.1158	0.1032			11 = 30% AC-NF
1	1	0.1443	0.1104	0.1525			12 = 15% AC-F
1	1	0.1751	0.1189	0.1143			13 = 30% AC-F
1	1	0.1651	0.1437	0.1115
1	1	0.1312	0.1487	0.0955
1	1	0.2034	0.1281	0.1275
1	1	0.1636	0.1634	0.1192
1	1	0.1948	0.1467	0.0811
1	2	0.201	0.1116	0.1062
1	2	0.2066	0.1364	0.1216
1	2	0.1596	0.1268	0.108
1	2	0.1554	0.1122	0.161
1	2	0.2148	0.1369	0.109
1	2	0.1882	0.129	0.1832
1	2	0.1938	0.1408	0.0756
1	2	0.2036	0.1504	0.1469
1	2	0.2108	0.14	0.0627
1	2	0.2046	0.1098	0.0667
1	2	0.1963	0.0964	0.0793
1	2	0.201	0.1394	0.1485
1	2	0.1268	0.1487	0.1352
1	2	0.1762	0.1414	0.0556
1	2	0.1975	0.1479	0.1207
1	2	0.216	0.14	0.0884
1	2	0.1897	0.1545	0.1166
1	2	0.1901	0.1274	0.1297
1	2	0.1927	0.1644	0.1473
1	2	0.2219	0.1307	0.1348
1	3	0.1302	0.1389	0.0943
1	3	0.1452	0.104	0.0102
1	3	0.1424	0.1144	0.0815
1	3	0.1503	0.1225	0.1267
1	3	0.1729	0.1179	0.0928
1	3	0.148	0.1046	0.0607
1	3	0.1702	0.1591	0.1017
1	3	0.1551	0.1073	0.0802
1	3	0.1223	0.1048	0.0844
1	3	0.1325	0.1209	0.1155
1	3	0.1091	0.1184	0.0701
1	3	0.1496	0.1082	0.0924
1	3	0.1429	0.105	0.0742
1	3	0.1538	0.1339	0.0956
1	3	0.1925	0.1231	0.0899
1	3	0.1467	0.128	0.0891
1	3	0.1599	0.1063	0.0929
1	3	0.2103	0.1002	0.0693
1	3	0.1238	0.1063	0.1024
1	3	0.1718	0.1162	0.0672
2	1	0.137	0.1084	0.0144
2	1	0.2113	0.1263	0.0794
2	1	0.1201	0.1135	0.0667
2	1	0.1147	0.1188	0.0867
2	1	0.1626	0.1425	0.047
2	1	0.2024	0.1065	0.0938
2	1	0.1396	0.1301	0.0658
2	1	0.1648	0.1081	0.0995
2	1	0.1579	0.1091	0.0859
2	1	0.1761	0.1186	0.0882
2	1	0.1001	0.1429	0.085
2	1	0.1447	0.1143	0.0727
2	1	0.1907	0.0928	0.1173
2	1	0.1761	0.1431	0.0389
2	1	0.157	0.1002	0.0786
2	1	0.1487	0.1411	0.0688
2	1	0.2051	0.115	0.086
2	1	0.088	0.0944	0.0881
2	1	0.186	0.105	0.0666
2	1	0.1059	0.1102	0.1135
2	2	0.2313	0.1297	0.0712
2	2	0.1157	0.1132	0.1226
2	2	0.1855	0.0768	0.1001
2	2	0.1826	0.1319	0.1222
2	2	0.1956	0.1409	0.0834
2	2	0.1776	0.1317	0.0889
2	2	0.2709	0.0907	0.111
2	2	0.1753	0.1186	0.0844
2	2	0.1663	0.0947	0.1375
2	2	0.1522	0.1141	0.0886
2	2	0.1713	0.1251	0.0713
2	2	0.2298	0.1106	0.0985
2	2	0.1582	0.1143	0.0726
2	2	0.1586	0.1125	0.0876
2	2	0.1226	0.1389	0.0743
2	2	0.0863	0.0911	0.1187
2	2	0.2105	0.1476	0.0617
2	2	0.1641	0.1193	0.0616
2	2	0.1698	0.1172	0.0845
2	2	0.1401	0.085	0.1089
2	3	0.1439	0.1096	0.0154
2	3	0.1585	0.0823	0.0563
2	3	0.1307	0.0907	0.0641
2	3	0.1327	0.0952	0.079
2	3	0.1284	0.094	0.0804
2	3	0.1965	0.1368	0.0616
2	3	0.1687	0.1091	0.0521
2	3	0.1604	0.0944	0.0894
2	3	0.1637	0.1017	0.0986
2	3	0.1177	0.0822	0.0587
2	3	0.1615	0.1297	0.0739
2	3	0.1291	0.085	0.0653
2	3	0.0998	0.093	0.0872
2	3	0.1342	0.0854	0.0773
2	3	0.1987	0.1063	0.088
2	3	0.1778	0.0892	0.0121
2	3	0.1188	0.0932	0.1411
2	3	0.1604	0.1296	0.0631
2	3	0.1217	0.0978	0.0517
2	3	0.1585	0.0735	0.0762
3	1	0.1564	0.0798	0.059
3	1	0.1155	0.0676	0.0112
3	1	0.1062	0.0864	0.0429
3	1	0.0922	0.0834	0.0575
3	1	0.1019	0.084	0.0533
3	1	0.0981	0.1163	0.0551
3	1	0.1141	0.0976	0.0192
3	1	0.1393	0.0733	0.0738
3	1	0.1153	0.0691	0.0686
3	1	0.0968	0.0873	0.0326
3	1	0.1156	0.0756	0.0421
3	1	0.0893	0.0576	0.0573
3	1	0.1062	0.0567	0.0181
3	1	0.1274	0.082	0.0628
3	1	0.0914	0.0891	0.0485
3	1	0.1104	0.0834	0.0505
3	1	0.1036	0.0698	0.0555
3	1	0.1162	0.083	0.0422
3	1	0.115	0.0768	0.0515
3	1	0.0702	0.0658	0.0557
3	2	0.1253	0.1134	0.0612
3	2	0.1125	0.0919	0.0104
3	2	0.1339	0.0693	0.0714
3	2	0.1557	0.0823	0.0855
3	2	0.1167	0.0852	0.0684
3	2	0.1286	0.0855	0.0711
3	2	0.1474	0.0882	0.0689
3	2	0.1796	0.0993	0.0114
3	2	0.137	0.1161	0.0188
3	2	0.1013	0.0882	0.0948
3	2	0.0827	0.0887	0.0497
3	2	0.1352	0.0945	0.0522
3	2	0.1317	0.087	0.065
3	2	0.2048	0.1008	0.0591
3	2	0.1735	0.1075	0.0606
3	2	0.1378	0.0574	0.0739
3	2	0.1386	0.0805	0.0662
3	2	0.1433	0.1094	0.0482
3	2	0.1203	0.0896	0.0981
3	2	0.1389	0.0642	0.0877
3	3	0.1689	0.1222	0.0851
3	3	0.1415	0.1155	0.0118
3	3	0.2082	0.0988	0.0552
3	3	0.1514	0.0969	0.0536
3	3	0.1218	0.0971	0.0721
3	3	0.1689	0.0791	0.0565
3	3	0.1341	0.0895	0.0697
3	3	0.1671	0.1313	0.0482
3	3	0.1949	0.0813	0.0559
3	3	0.1833	0.1159	0.0679
3	3	0.1916	0.0992	0.0984
3	3	0.1422	0.0719	0.0666
3	3	0.2039	0.0989	0.0609
3	3	0.1555	0.1041	0.0476
3	3	0.1661	0.1012	0.065
3	3	0.1378	0.1158	0.0503
3	3	0.1316	0.0682	0.0713
3	3	0.1791	0.1028	0.0696
3	3	0.1511	0.1041	0.0681
3	3	0.122	0.1432	0.0583
4	1	0.1969	0.1136	0.0532
4	1	0.1155	0.1281	0.0436
4	1	0.1508	0.1124	0.0567
4	1	0.1057	0.0972	0.1026
4	1	0.1602	0.078	0.0696
4	1	0.1983	0.1458	0.0697
4	1	0.0871	0.0819	0.0809
4	1	0.119	0.0977	0.0811
4	1	0.1149	0.1215	0.0834
4	1	0.0915	0.0739	0.0665
4	1	0.0785	0.0951	0.0788
4	1	0.0816	0.0769	0.0881
4	1	0.1226	0.0983	0.0866
4	1	0.1236	0.0874	0.1017
4	1	0.1193	0.0901	0.0799
4	1	0.1231	0.0808	0.0512
4	1	0.1366	0.0802	0.0774
4	1	0.1173	0.0881	0.0678
4	1	0.067	0.0889	0.0518
4	1	0.0726	0.1189	0.0598
4	2	0.1439	0.1096	0.0768
4	2	0.0978	0.0857	0.0753
4	2	0.1048	0.0972	0.0949
4	2	0.1422	0.1053	0.0188
4	2	0.1669	0.105	0.0729
4	2	0.0859	0.1108	0.0491
4	2	0.1757	0.088	0.0837
4	2	0.1086	0.1277	0.0767
4	2	0.1572	0.1054	0.093
4	2	0.1459	0.1037	0.0783
4	2	0.1648	0.104	0.0699
4	2	0.0797	0.1171	0.0455
4	2	0.1627	0.1132	0.0664
4	2	0.0758	0.097	0.056
4	2	0.1135	0.1112	0.0867
4	2	0.1475	0.0947	0.0628
4	2	0.1242	0.1022	0.0689
4	2	0.1189	0.0852	0.0669
4	2	0.1396	0.0907	0.0588
4	2	0.0984	0.1	0.071
4	3	0.1715	0.1109	0.1039
4	3	0.1266	0.0906	0.0699
4	3	0.1143	0.1131	0.0947
4	3	0.2087	0.121	0.0236
4	3	0.1842	0.0845	0.1006
4	3	0.143	0.1181	0.0908
4	3	0.1519	0.051	0.0876
4	3	0.1066	0.1155	0.0588
4	3	0.1502	0.1034	0.09
4	3	0.1841	0.1186	0.0883
4	3	0.1858	0.123	0.0666
4	3	0.1559	0.1013	0.0487
4	3	0.147	0.1047	0.1017
4	3	0.1461	0.1407	0.0712
4	3	0.14	0.1164	0.0949
4	3	0.1287	0.112	0.0788
4	3	0.162	0.1211	0.0569
4	3	0.0953	0.122	0.0626
4	3	0.1195	0.1066	0.0669
4	3	0.1903	0.0715	0.0641
5	1	0.1411	0.0787	0.0564
5	1	0.1764	0.0713	0.0722
5	1	0.1569	0.0738	0.0557
5	1	0.0897	0.0701	0.066
5	1	0.1435	0.0863	0.0693
5	1	0.091	0.0725	0.0527
5	1	0.1284	0.0755	0.0369
5	1	0.1107	0.08	0.061
5	1	0.1253	0.0654	0.0611
5	1	0.1089	0.0817	0.0667
5	1	0.1316	0.0878	0.0745
5	1	0.1321	0.0735	0.053
5	1	0.1232	0.0737	0.0107
5	1	0.1446	0.0658	0.0468
5	1	0.1311	0.0752	0.0428
5	1	0.1246	0.0978	0.0595
5	1	0.1525	0.0695	0.0279
5	1	0.1475	0.0768	0.0106
5	1	0.0967	0.0573	0.0116
5	1	0.1095	0.0599	0.0101
5	2	0.1148	0.0821	0.0155
5	2	0.1278	0.0975	0.0762
5	2	0.2001	0.0894	0.0677
5	2	0.1945	0.0937	0.0477
5	2	0.1312	0.1077	0.0518
5	2	0.1448	0.1047	0.0383
5	2	0.1716	0.0753	0.0793
5	2	0.13	0.0704	0.0608
5	2	0.1245	0.0944	0.0146
5	2	0.1541	0.0722	0.0651
5	2	0.1235	0.0762	0.0533
5	2	0.1026	0.0922	0.0606
5	2	0.1377	0.093	0.0626
5	2	0.1609	0.081	0.0292
5	2	0.1445	0.0788	0.0602
5	2	0.0956	0.0905	0.0547
5	2	0.1424	0.0857	0.0572
5	2	0.1701	0.0853	0.0621
5	2	0.0989	0.0733	0.054
5	2	0.098	0.0824	0.0323
5	3	0.123	0.0783	0.0569
5	3	0.11	0.0841	0.052
5	3	0.1374	0.0936	0.0666
5	3	0.1234	0.0549	0.062
5	3	0.1479	0.0823	0.0472
5	3	0.152	0.0528	0.0288
5	3	0.1335	0.0786	0.0555
5	3	0.1165	0.0916	0.1236
5	3	0.1692	0.1061	0.078
5	3	0.1935	0.075	0.0115
5	3	0.1426	0.0863	0.0531
5	3	0.1515	0.0728	0.0333
5	3	0.1639	0.0841	0.0527
5	3	0.0659	0.0716	0.0543
5	3	0.1379	0.0769	0.0533
5	3	0.138	0.0772	0.0516
5	3	0.1221	0.077	0.0546
5	3	0.132	0.0722	0.0546
5	3	0.1147	0.0998	0.0366
5	3	0.1379	0.0851	0.0566
6	1	0.2105	0.1237	0.0826
6	1	0.181	0.101	0.0384
6	1	0.2019	0.0866	0.1182
6	1	0.1971	0.1068	0.0875
6	1	0.1925	0.1286	0.0835
6	1	0.1359	0.085	0.0756
6	1	0.2338	0.1309	0.1016
6	1	0.1693	0.1084	0.1164
6	1	0.1975	0.1065	0.0872
6	1	0.1728	0.0899	0.1025
6	1	0.1858	0.1115	0.0381
6	1	0.1617	0.1034	0.1019
6	1	0.2038	0.0897	0.0877
6	1	0.2058	0.1056	0.0889
6	1	0.1784	0.0995	0.095
6	1	0.1743	0.1493	0.0819
6	1	0.1629	0.1162	0.103
6	1	0.1812	0.1058	0.1115
6	1	0.1909	0.099	0.0997
6	1	0.1628	0.1196	0.0769
6	2	0.1568	0.104	0.0555
6	2	0.2089	0.1206	0.0964
6	2	0.1281	0.0978	0.105
6	2	0.1769	0.087	0.0913
6	2	0.1345	0.1131	0.0906
6	2	0.1514	0.1301	0.0962
6	2	0.1461	0.0705	0.0724
6	2	0.1319	0.09	0.0791
6	2	0.1979	0.1278	0.0615
6	2	0.1104	0.112	0.0972
6	2	0.14	0.098	0.066
6	2	0.1539	0.0958	0.0431
6	2	0.1326	0.1064	0.0763
6	2	0.1787	0.1037	0.0781
6	2	0.1243	0.1049	0.0893
6	2	0.1491	0.1197	0.1031
6	2	0.1155	0.1167	0.0726
6	2	0.106	0.1126	0.061
6	2	0.1603	0.1158	0.0505
6	2	0.1725	0.108	0.0573
6	3	0.1866	0.1095	0.1037
6	3	0.1737	0.0898	0.0886
6	3	0.1355	0.0949	0.0114
6	3	0.151	0.1076	0.059
6	3	0.1559	0.1185	0.065
6	3	0.1783	0.1012	0.0799
6	3	0.1464	0.0794	0.0697
6	3	0.16	0.1397	0.0689
6	3	0.1922	0.0987	0.0833
6	3	0.132	0.1318	0.0992
6	3	0.149	0.1165	0.0748
6	3	0.2419	0.1267	0.092
6	3	0.1593	0.0918	0.0661
6	3	0.1547	0.0952	0.0915
6	3	0.1702	0.0855	0.1376
6	3	0.1433	0.1151	0.0802
6	3	0.1706	0.0939	0.0855
6	3	0.1698	0.1143	0.0907
6	3	0.1966	0.1008	0.0508
6	3	0.2296	0.1085	0.0516
7	1	0.1424	0.0797	0.0662
7	1	0.1411	0.1121	0.0565
7	1	0.1	0.0753	0.1159
7	1	0.0934	0.0937	0.0549
7	1	0.1046	0.0816	0.055
7	1	0.0816	0.0979	0.0668
7	1	0.111	0.0725	0.0631
7	1	0.1091	0.0501	0.0566
7	1	0.1405	0.0732	0.0869
7	1	0.1018	0.0849	0.0511
7	1	0.0811	0.0653	0.0657
7	1	0.117	0.0754	0.0519
7	1	0.1125	0.0537	0.0539
7	1	0.125	0.0806	0.0167
7	1	0.0859	0.0685	0.073
7	1	0.0923	0.0812	0.07
7	1	0.0952	0.0705	0.0646
7	1	0.109	0.0677	0.029
7	1	0.0932	0.076	0.0522
7	1	0.0905	0.0726	0.0617
7	2	0.1766	0.0908	0.0613
7	2	0.1435	0.0729	0.0698
7	2	0.1311	0.0733	0.1027
7	2	0.1629	0.0733	0.0655
7	2	0.143	0.0767	0.0793
7	2	0.1498	0.077	0.0837
7	2	0.2148	0.0846	0.0711
7	2	0.1988	0.0767	0.0645
7	2	0.1979	0.0854	0.0752
7	2	0.1327	0.0868	0.0686
7	2	0.1127	0.0979	0.0861
7	2	0.1748	0.1167	0.0739
7	2	0.1906	0.095	0.0736
7	2	0.1581	0.0737	0.0701
7	2	0.1672	0.0855	0.0667
7	2	0.1158	0.1056	0.1088
7	2	0.118	0.0738	0.0649
7	2	0.1563	0.0591	0.0731
7	2	0.1441	0.0602	0.0664
7	2	0.1105	0.0742	0.0623
7	3	0.1447	0.0781	0.081
7	3	0.1678	0.0822	0.0618
7	3	0.1704	0.0891	0.0764
7	3	0.0972	0.0906	0.0674
7	3	0.1538	0.0757	0.0585
7	3	0.1119	0.0802	0.0561
7	3	0.1478	0.0683	0.0761
7	3	0.1631	0.099	0.0631
7	3	0.1305	0.0709	0.0715
7	3	0.0916	0.0828	0.0578
7	3	0.1216	0.0779	0.0906
7	3	0.0994	0.0754	0.0502
7	3	0.1206	0.0784	0.0692
7	3	0.1417	0.0764	0.0763
7	3	0.1287	0.0742	0.0717
7	3	0.1391	0.0825	0.0757
7	3	0.1407	0.995	0.0411
7	3	0.1524	0.0668	0.0825
7	3	0.1247	0.0785	0.077
7	3	0.0896	0.0458	0.0626
8	1	0.184	0.0909	0.0802
8	1	0.1708	0.0862	0.0881
8	1	0.1853	0.1107	0.055
8	1	0.162	0.0991	0.0496
8	1	0.1472	0.0929	0.0579
8	1	0.1591	0.1015	0.068
8	1	0.1499	0.0788	0.081
8	1	0.1974	0.0687	0.0412
8	1	0.1522	0.0994	0.0757
8	1	0.0991	0.0865	0.0285
8	1	0.0969	0.164	0.0725
8	1	0.1763	0.1128	0.1037
8	1	0.1655	0.1223	0.0681
8	1	0.0722	0.092	0.0615
8	1	0.0613	0.1186	0.0803
8	1	0.1363	0.099	0.057
8	1	0.1948	0.089	0.0776
8	1	0.175	0.1443	0.1204
8	1	0.1557	0.0898	0.0636
8	1	0.1161	0.0756	0.074
8	2	0.2015	0.1204	0.0955
8	2	0.2155	0.1042	0.0971
8	2	0.1665	0.0738	0.1017
8	2	0.2029	0.099	0.0595
8	2	0.1401	0.1118	0.0947
8	2	0.1958	0.1324	0.0947
8	2	0.1268	0.1117	0.0704
8	2	0.1649	0.1123	0.0886
8	2	0.2368	0.1102	0.1035
8	2	0.155	0.1236	0.0899
8	2	0.1437	0.1143	0.0885
8	2	0.1836	0.1188	0.1002
8	2	0.1262	0.1432	0.0778
8	2	0.1859	0.1294	0.0705
8	2	0.1484	0.0861	0.1153
8	2	0.2233	0.0904	0.0819
8	2	0.1716	0.1109	0.0593
8	2	0.1755	0.1199	0.0764
8	2	0.1946	0.1123	0.079
8	2	0.1829	0.0891	0.0657
8	3	0.1898	0.0956	0.0346
8	3	0.1252	0.1405	0.0787
8	3	0.146	0.1021	0.0623
8	3	0.1544	0.1068	0.0744
8	3	0.1845	0.1285	0.0821
8	3	0.1389	0.1256	0.0747
8	3	0.1687	0.1035	0.0768
8	3	0.1205	0.1052	0.0455
8	3	0.1413	0.104	0.0826
8	3	0.1846	0.1138	0.0513
8	3	0.1004	0.1146	0.0726
8	3	0.1786	0.1321	0.0741
8	3	0.1227	0.133	0.0877
8	3	0.116	0.1236	0.1236
8	3	0.1314	0.1241	0.1284
8	3	0.153	0.1008	0.0767
8	3	0.129	0.0985	0.046
8	3	0.135	0.1086	0.1314
8	3	0.918	0.138	0.0737
8	3	0.0931	0.1042	0.0463
9	1	0.1618	0.0797	0.0303
9	1	0.1387	0.0845	0.0593
9	1	0.1593	0.0741	0.0533
9	1	0.1604	0.0852	0.0498
9	1	0.1421	0.0779	0.0644
9	1	0.2027	0.0775	0.0436
9	1	0.1238	0.0778	0.0427
9	1	0.1902	0.0852	0.0599
9	1	0.122	0.0846	0.0589
9	1	0.2221	0.0554	0.0559
9	1	0.1506	0.0874	0.0457
9	1	0.0953	0.0741	0.0593
9	1	0.0954	0.0769	0.0766
9	1	0.1045	0.0766	0.0447
9	1	0.1136	0.0915	0.0317
9	1	0.1688	0.0751	0.0757
9	1	0.19	0.0937	0.0653
9	1	0.1148	0.072	0.0537
9	1	0.1055	0.0594	0.0744
9	1	0.1559	0.0915	0.0555
9	2	0.0923	0.1545	0.0649
9	2	0.1571	0.0615	0.0826
9	2	0.1475	0.0837	0.0646
9	2	0.169	0.0936	0.0947
9	2	0.1299	0.0846	0.0503
9	2	0.1391	0.1025	0.0699
9	2	0.1572	0.0551	0.0651
9	2	0.1479	0.1405	0.0794
9	2	0.0994	0.0888	0.0637
9	2	0.0995	0.0921	0.0506
9	2	0.1619	0.0721	0.0655
9	2	0.1481	0.0751	0.0643
9	2	0.1398	0.0845	0.0704
9	2	0.1463	0.0784	0.0755
9	2	0.1566	0.0945	0.077
9	2	0.1701	0.0656	0.0485
9	2	0.1517	0.0547	0.0475
9	2	0.1037	0.0745	0.0358
9	2	0.1654	0.0894	0.051
9	2	0.1464	0.0745	0.071
9	3	0.0952	0.1092	0.0283
9	3	0.1119	0.1248	0.0505
9	3	0.1415	0.0874	0.0615
9	3	0.0958	0.0873	0.0404
9	3	0.1153	0.0745	0.0668
9	3	0.0999	0.0945	0.0618
9	3	0.1442	0.0845	0.0601
9	3	0.1103	0.0774	0.0551
9	3	0.119	0.0654	0.0601
9	3	0.0767	0.0846	0.0758
9	3	0.0824	0.0751	0.0515
9	3	0.1267	0.087	0.052
9	3	0.1363	0.0804	0.0586
9	3	0.1349	0.0788	0.072
9	3	0.0895	0.0791	0.068
9	3	0.0715	0.0582	0.0432
9	3	0.1656	0.1068	0.0554
9	3	0.1171	0.1286	0.0756
9	3	0.0914	0.092	0.058
9	3	0.1553	0.0742	0.0593
10	1	0.182	0.1031	0.0961
10	1	0.1122	0.1098	0.0914
10	1	0.1982	0.0883	0.1253
10	1	0.0888	0.0864	0.1133
10	1	0.1658	0.0845	0.0669
10	1	0.1655	0.0883	0.1037
10	1	0.1496	0.2012	0.086
10	1	0.1102	0.1077	0.0839
10	1	0.1385	0.0943	0.0206
10	1	0.1302	0.1306	0.0832
10	1	0.1348	0.0942	0.0375
10	1	0.1137	0.1057	0.0671
10	1	0.1469	0.0989	0.0657
10	1	0.1777	0.0819	0.0704
10	1	0.189	0.092	0.105
10	1	0.1756	0.0914	0.0247
10	1	0.1544	0.1009	0.0672
10	1	0.1261	0.1142	0.1116
10	1	0.1234	0.1025	0.0678
10	1	0.1853	0.1092	0.0878
10	2	0.1684	0.1337	0.0682
10	2	0.1465	0.1375	0.0928
10	2	0.1913	0.1245	0.1138
10	2	0.1683	0.1234	0.0762
10	2	0.1607	0.0994	0.0749
10	2	0.1935	0.0845	0.0849
10	2	0.2001	0.1221	0.13
10	2	0.1764	0.0998	0.1087
10	2	0.229	0.1083	0.1097
10	2	0.189	0.1275	0.0912
10	2	0.1848	0.1375	0.098
10	2	0.1768	0.1457	0.0817
10	2	0.1532	0.114	0.0935
10	2	0.1911	0.1245	0.1138
10	2	0.1506	0.0996	0.1038
10	2	0.1828	0.1325	0.0773
10	2	0.1942	0.0841	0.1122
10	2	0.1807	0.0885	0.0794
10	2	0.1772	0.1335	0.0612
10	2	0.2001	0.0991	0.1102
10	3	0.0612	0.1086	0.0909
10	3	0.1919	0.112	0.0845
10	3	0.1944	0.0995	0.0885
10	3	0.0707	0.109	0.087
10	3	0.1427	0.0918	0.0907
10	3	0.1769	0.0876	0.0574
10	3	0.123	0.1121	0.1035
10	3	0.1709	0.1215	0.1065
10	3	0.1333	0.1077	0.092
10	3	0.1287	0.1103	0.1133
10	3	0.1701	0.0941	0.0681
10	3	0.0824	0.108	0.0887
10	3	0.0759	0.0774	0.0623
10	3	0.1429	0.1033	0.0736
10	3	0.2256	0.0851	0.1014
10	3	0.0972	0.0843	0.0485
10	3	0.1827	0.0966	0.0824
10	3	0.1188	0.0921	0.0514
10	3	0.2078	0.0887	0.0874
10	3	0.1255	0.0995	0.0603
11	1	0.1254	0.072	0.0258
11	1	0.1181	0.0516	0.0524
11	1	0.0906	0.0661	0.0569
11	1	0.0845	0.0447	0.0481
11	1	0.12	0.0665	0.0387
11	1	0.1225	0.0661	0.0393
11	1	0.0799	0.0546	0.0276
11	1	0.1038	0.0491	0.0469
11	1	0.1439	0.0383	0.0524
11	1	0.1239	0.0679	0.0331
11	1	0.0837	0.0874	0.0521
11	1	0.0989	0.0521	0.038
11	1	0.1342	0.0455	0.0173
11	1	0.0816	0.0654	0.0246
11	1	0.1088	0.0559	0.038
11	1	0.1145	0.0574	0.0395
11	1	0.0885	0.0669	0.038
11	1	0.0896	0.0441	0.0419
11	1	0.1025	0.0399	0.0327
11	1	0.1053	0.0441	0.0213
11	2	0.1146	0.0554	0.0784
11	2	0.0948	0.0711	0.0484
11	2	0.1069	0.0633	0.0446
11	2	0.1342	0.0645	0.0374
11	2	0.1071	0.0902	0.0692
11	2	0.1491	0.0662	0.0335
11	2	0.0596	0.0787	0.0233
11	2	0.0586	0.0667	0.033
11	2	0.0755	0.0664	0.0665
11	2	0.1126	0.0556	0.025
11	2	0.0876	0.0889	0.0577
11	2	0.0932	0.0657	0.0338
11	2	0.0745	0.0578	0.0717
11	2	0.1071	0.0583	0.033
11	2	0.0946	0.0845	0.0552
11	2	0.1045	0.0464	0.0378
11	2	0.1041	0.0775	0.0336
11	2	0.1076	0.0642	0.0467
11	2	0.088	0.0671	0.0499
11	2	0.0827	0.0678	0.0452
11	3	0.1218	0.0798	0.0549
11	3	0.1191	0.0964	0.0302
11	3	0.0997	0.0477	0.0594
11	3	0.0665	0.0422	0.0598
11	3	0.0955	0.0565	0.0513
11	3	0.1024	0.0592	0.0362
11	3	0.0816	0.1187	0.0224
11	3	0.1255	0.0681	0.0749
11	3	0.1162	0.0769	0.0593
11	3	0.1071	0.0751	0.0326
11	3	0.0449	0.0723	0.0398
11	3	0.0616	0.0732	0.0462
11	3	0.0718	0.0898	0.0642
11	3	0.1043	0.0699	0.0492
11	3	0.0995	0.0687	0.0563
11	3	0.0542	0.0971	0.0476
11	3	0.0472	0.0852	0.0371
11	3	0.0735	0.0575	0.0322
11	3	0.0802	0.0732	0.0392
11	3	0.0783	0.0492	0.0292
12	1	0.1668	0.1043	0.0812
12	1	0.2014	0.827	0.0962
12	1	0.1975	0.0807	0.1086
12	1	0.1973	0.855	0.104
12	1	0.1864	0.0841	0.0949
12	1	0.1924	0.0949	0.0763
12	1	0.1745	0.1053	0.1195
12	1	0.1483	0.1094	0.0731
12	1	0.1945	0.1099	0.0481
12	1	0.2057	0.0911	0.1151
12	1	0.1332	0.0952	0.0834
12	1	0.1821	0.0967	0.0979
12	1	0.1745	0.0885	0.0784
12	1	0.2079	0.0758	0.0506
12	1	0.1973	0.0965	0.0938
12	1	0.1715	0.1003	0.0756
12	1	0.1032	0.0987	0.0692
12	1	0.1951	0.0884	0.0815
12	1	0.1914	0.1004	0.0623
12	1	0.2011	0.0945	0.0987
12	2	0.2044	0.0616	0.0821
12	2	0.1017	0.1812	0.0864
12	2	0.1588	0.0889	0.0889
12	2	0.215	0.0933	0.1199
12	2	0.2021	0.0972	0.0914
12	2	0.1434	0.068	0.0891
12	2	0.1397	0.1068	0.096
12	2	0.2052	0.0996	0.1085
12	2	0.1683	0.0854	0.0879
12	2	0.2103	0.1022	0.094
12	2	0.1999	0.0984	0.089
12	2	0.168	0.1404	0.096
12	2	0.2234	0.1055	0.0821
12	2	0.1271	0.0927	0.0913
12	2	0.1251	0.0884	0.086
12	2	0.2047	0.0964	0.0865
12	2	0.1556	0.1105	0.0961
12	2	0.0995	0.0961	0.0596
12	2	0.1221	0.102	0.0839
12	2	0.1325	0.0842	0.0913
12	3	0.1481	0.1014	0.0861
12	3	0.199	0.1171	0.0988
12	3	0.2021	0.1019	0.0986
12	3	0.1334	0.103	0.0914
12	3	0.1698	0.1103	0.0776
12	3	0.1801	0.1161	0.093
12	3	0.1512	0.1034	0.0787
12	3	0.1991	0.1022	0.06
12	3	0.1467	0.0996	0.0827
12	3	0.1382	0.1023	0.0714
12	3	0.1087	0.1216	0.0832
12	3	0.1414	0.1035	0.0679
12	3	0.1338	0.0961	0.0887
12	3	0.1095	0.1024	0.0896
12	3	0.1548	0.1051	0.0746
12	3	0.1009	0.1026	0.0708
12	3	0.1593	0.1005	0.0777
12	3	0.1653	0.1103	0.0845
12	3	0.0904	0.0992	0.0622
12	3	0.0963	0.1021	0.1074
13	1	0.1339	0.0723	0.054
13	1	0.1187	0.0566	0.0477
13	1	0.1184	0.0562	0.0445
13	1	0.1392	0.0552	0.024
13	1	0.1328	0.0621	0.0489
13	1	0.1008	0.0745	0.053
13	1	0.1459	0.0578	0.033
13	1	0.1514	0.0578	0.0372
13	1	0.159	0.0541	0.0286
13	1	0.0783	0.0662	0.0397
13	1	0.1684	0.0569	0.0595
13	1	0.1099	0.0583	0.0505
13	1	0.1172	0.0535	0.0481
13	1	0.1153	0.0519	0.0509
13	1	0.1438	0.0537	0.0402
13	1	0.1232	0.0612	0.0324
13	1	0.1351	0.0663	0.048
13	1	0.0997	0.0722	0.0379
13	1	0.1242	0.0809	0.0558
13	1	0.088	0.0851	0.0447
13	2	0.1575	0.0683	0.0543
13	2	0.1518	0.0874	0.0443
13	2	0.1488	0.0512	0.0814
13	2	0.1262	0.0962	0.0506
13	2	0.1324	0.0845	0.0583
13	2	0.1532	0.0614	0.0575
13	2	0.1225	0.0625	0.0656
13	2	0.1429	0.0648	0.0516
13	2	0.152	0.0754	0.0598
13	2	0.1044	0.0514	0.058
13	2	0.1302	0.0602	0.0523
13	2	0.0614	0.0694	0.0505
13	2	0.1339	0.1036	0.0567
13	2	0.1201	0.0922	0.0408
13	2	0.1572	0.0984	0.0409
13	2	0.185	0.1023	0.0652
13	2	0.1528	0.1125	0.0406
13	2	0.1264	0.0927	0.0496
13	2	0.0888	0.1036	0.0418
13	2	0.1272	0.0916	0.0655
13	3	0.1188	0.0717	0.1065
13	3	0.1321	0.0789	0.0653
13	3	0.1099	0.0779	0.053
13	3	0.1435	0.078	0.0782
13	3	0.1408	0.085	0.0527
13	3	0.1343	0.0819	0.0592
13	3	0.1358	0.0854	0.0626
13	3	0.1577	0.0542	0.0612
13	3	0.1583	0.0835	0.0538
13	3	0.1229	0.0666	0.0703
13	3	0.1246	0.0554	0.0576
13	3	0.0685	0.0661	0.0648
13	3	0.1335	0.0625	0.0601
13	3	0.1256	0.0512	0.0581
13	3	0.1719	0.0582	0.0122
13	3	0.1231	0.0661	0.0646
13	3	0.12	0.0547	0.0654
13	3	0.1493	0.0582	0.0427
13	3	0.1554	0.0851	0.0847
13	3	0.1428	0.0965	0.0087

## Sheet: Biomass
Treatment	Replicate	Total prepupal weight (g)
1	1	34.5312
1	2	41.2586
1	3	40.3162
2	1	33.8051
2	2	36.0554
2	3	29.4982
3	1	35.4052
3	2	33.9004
3	3	31.591
4	1	31.825
4	2	37.6
4	3	27.05
5	1	27.4
5	2	26.5213
5	3	43.9032
6	1	35.0758
6	2	35.68
6	3	33.323
7	1	27.98
7	2	39.8771
7	3	28.1935
8	1	34.6441
8	2	21.3435
8	3	23.6993
9	1	30.0639
9	2	30.0082
9	3	30.9014
10	1	29.0371
10	2	35.9278
10	3	34.2112
11	1	22.94
11	2	24.4786
11	3	21.4451
12	1	28.7413
12	2	33.9071
12	3	35.2271
13	1	24.3271
13	2	30.4697
13	3	25.0259

## Sheet: Larval duration
Larval duration	Treatment	Rep		Code for treatments
17	1	1		1 = VEG
17	1	1		2 = 15% LP-NF
17	1	1		3 = 30%LP-NF
18	1	1		4 = 15% LP-F
18	1	1		5 = 30%LP-F
18	1	1		6 = 15% PP-NF
18	1	1		7 = 30% PP-NF
18	1	1		8 = 15% PP-F
18	1	1		9 = 30% PP-F
18	1	1		10 = 15% AC-NF
18	1	1		11 = 30% AC-NF
18	1	1		12 = 15% AC-F
18	1	1		13 = 30% AC-F
18	1	1
19	1	1
19	1	1
19	1	1
19	1	1
19	1	1
19	1	1
19	1	1
19	1	1
19	1	1
19	1	1
19	1	1
19	1	1
19	1	1
19	1	1
19	1	1
19	1	1
19	1	1
19	1	1
19	1	1
19	1	1
19	1	1
19	1	1
19	1	1
19	1	1
19	1	1
19	1	1
19	1	1
19	1	1
19	1	1
19	1	1
19	1	1
20	1	1
20	1	1
20	1	1
20	1	1
20	1	1
20	1	1
20	1	1
20	1	1
20	1	1
20	1	1
20	1	1
20	1	1
20	1	1
20	1	1
20	1	1
20	1	1
20	1	1
20	1	1
20	1	1
20	1	1
20	1	1
20	1	1
20	1	1
20	1	1
20	1	1
20	1	1
20	1	1
20	1	1
20	1	1
20	1	1
20	1	1
20	1	1
20	1	1
20	1	1
20	1	1
20	1	1
20	1	1
20	1	1
20	1	1
20	1	1
20	1	1
20	1	1
20	1	1
20	1	1
20	1	1
20	1	1
20	1	1
20	1	1
20	1	1
20	1	1
20	1	1
20	1	1
20	1	1
20	1	1
20	1	1
20	1	1
20	1	1
20	1	1
20	1	1
20	1	1
20	1	1
20	1	1
20	1	1
20	1	1
20	1	1
20	1	1
20	1	1
20	1	1
20	1	1
20	1	1
20	1	1
20	1	1
20	1	1
20	1	1
20	1	1
20	1	1
20	1	1
20	1	1
20	1	1
20	1	1
20	1	1
20	1	1
20	1	1
20	1	1
20	1	1
20	1	1
20	1	1
20	1	1
20	1	1
20	1	1
20	1	1
20	1	1
20	1	1
20	1	1
20	1	1
20	1	1
20	1	1
20	1	1
20	1	1
20	1	1
20	1	1
20	1	1
20	1	1
20	1	1
20	1	1
20	1	1
20	1	1
20	1	1
20	1	1
20	1	1
20	1	1
20	1	1
20	1	1
20	1	1
20	1	1
20	1	1
20	1	1
21	1	1
21	1	1
21	1	1
21	1	1
21	1	1
21	1	1
21	1	1
21	1	1
21	1	1
21	1	1
21	1	1
21	1	1
21	1	1
21	1	1
21	1	1
21	1	1
21	1	1
21	1	1
21	1	1
21	1	1
21	1	1
21	1	1
21	1	1
21	1	1
21	1	1
21	1	1
21	1	1
21	1	1
21	1	1
21	1	1
21	1	1
21	1	1
21	1	1
21	1	1
21	1	1
21	1	1
21	1	1
21	1	1
22	1	1
22	1	1
22	1	1
22	1	1
22	1	1
22	1	1
22	1	1
22	1	1
22	1	1
22	1	1
22	1	1
22	1	1
22	1	1
23	1	1
23	1	1
23	1	1
24	1	1
24	1	1
24	1	1
24	1	1
24	1	1
24	1	1
24	1	1
25	1	1
25	1	1
25	1	1
26	1	1
26	1	1
26	1	1
26	1	1
27	1	1
27	1	1
27	1	1
27	1	1
27	1	1
28	1	1
29	1	1
30	1	1
30	1	1
33	1	1
17	1	2
17	1	2
17	1	2
17	1	2
17	1	2
18	1	2
18	1	2
18	1	2
18	1	2
18	1	2
18	1	2
18	1	2
18	1	2
18	1	2
18	1	2
18	1	2
18	1	2
18	1	2
18	1	2
18	1	2
18	1	2
18	1	2
18	1	2
18	1	2
18	1	2
18	1	2
18	1	2
18	1	2
18	1	2
18	1	2
18	1	2
18	1	2
18	1	2
18	1	2
18	1	2
18	1	2
18	1	2
18	1	2
18	1	2
18	1	2
18	1	2
18	1	2
18	1	2
18	1	2
18	1	2
18	1	2
18	1	2
18	1	2
18	1	2
18	1	2
19	1	2
19	1	2
19	1	2
19	1	2
19	1	2
19	1	2
19	1	2
19	1	2
19	1	2
19	1	2
19	1	2
19	1	2
19	1	2
19	1	2
19	1	2
19	1	2
19	1	2
19	1	2
19	1	2
19	1	2
19	1	2
19	1	2
19	1	2
19	1	2
19	1	2
19	1	2
19	1	2
19	1	2
19	1	2
19	1	2
19	1	2
19	1	2
19	1	2
19	1	2
19	1	2
19	1	2
19	1	2
19	1	2
19	1	2
19	1	2
19	1	2
19	1	2
19	1	2
19	1	2
19	1	2
19	1	2
19	1	2
19	1	2
19	1	2
19	1	2
19	1	2
19	1	2
19	1	2
19	1	2
19	1	2
19	1	2
19	1	2
19	1	2
19	1	2
19	1	2
19	1	2
19	1	2
19	1	2
19	1	2
19	1	2
19	1	2
19	1	2
19	1	2
19	1	2
19	1	2
19	1	2
19	1	2
19	1	2
19	1	2
19	1	2
19	1	2
19	1	2
19	1	2
19	1	2
19	1	2
19	1	2
19	1	2
19	1	2
19	1	2
19	1	2
19	1	2
19	1	2
19	1	2
19	1	2
19	1	2
19	1	2
19	1	2
19	1	2
19	1	2
19	1	2
19	1	2
19	1	2
19	1	2
19	1	2
19	1	2
19	1	2
19	1	2
19	1	2
19	1	2
19	1	2
19	1	2
19	1	2
19	1	2
20	1	2
20	1	2
20	1	2
20	1	2
20	1	2
20	1	2
20	1	2
20	1	2
20	1	2
20	1	2
20	1	2
20	1	2
20	1	2
20	1	2
20	1	2
20	1	2
20	1	2
20	1	2
20	1	2
20	1	2
20	1	2
20	1	2
20	1	2
20	1	2
20	1	2
20	1	2
20	1	2
20	1	2
20	1	2
20	1	2
20	1	2
20	1	2
20	1	2
20	1	2
20	1	2
20	1	2
20	1	2
20	1	2
20	1	2
20	1	2
20	1	2
20	1	2
20	1	2
20	1	2
20	1	2
20	1	2
20	1	2
20	1	2
20	1	2
20	1	2
20	1	2
20	1	2
20	1	2
20	1	2
20	1	2
20	1	2
20	1	2
20	1	2
20	1	2
20	1	2
20	1	2
20	1	2
20	1	2
20	1	2
20	1	2
20	1	2
21	1	2
21	1	2
21	1	2
21	1	2
21	1	2
21	1	2
21	1	2
21	1	2
21	1	2
21	1	2
21	1	2
22	1	2
22	1	2
22	1	2
22	1	2
22	1	2
22	1	2
22	1	2
23	1	2
23	1	2
23	1	2
24	1	2
24	1	2
24	1	2
24	1	2
24	1	2
24	1	2
25	1	2
25	1	2
25	1	2
26	1	2
26	1	2
26	1	2
27	1	2
27	1	2
28	1	2
28	1	2
29	1	2
29	1	2
17	1	3
17	1	3
17	1	3
17	1	3
18	1	3
18	1	3
18	1	3
18	1	3
18	1	3
18	1	3
18	1	3
18	1	3
18	1	3
18	1	3
18	1	3
18	1	3
18	1	3
18	1	3
18	1	3
18	1	3
18	1	3
18	1	3
18	1	3
18	1	3
18	1	3
18	1	3
18	1	3
18	1	3
18	1	3
18	1	3
18	1	3
18	1	3
18	1	3
18	1	3
18	1	3
18	1	3
18	1	3
18	1	3
18	1	3
18	1	3
18	1	3
18	1	3
18	1	3
18	1	3
18	1	3
18	1	3
18	1	3
18	1	3
18	1	3
18	1	3
18	1	3
18	1	3
18	1	3
18	1	3
18	1	3
18	1	3
18	1	3
18	1	3
19	1	3
19	1	3
19	1	3
19	1	3
19	1	3
19	1	3
19	1	3
19	1	3
19	1	3
19	1	3
19	1	3
19	1	3
19	1	3
19	1	3
19	1	3
19	1	3
19	1	3
19	1	3
19	1	3
19	1	3
19	1	3
19	1	3
19	1	3
19	1	3
19	1	3
19	1	3
19	1	3
19	1	3
19	1	3
19	1	3
19	1	3
19	1	3
19	1	3
19	1	3
19	1	3
19	1	3
19	1	3
19	1	3
19	1	3
19	1	3
19	1	3
19	1	3
19	1	3
19	1	3
19	1	3
19	1	3
19	1	3
19	1	3
19	1	3
19	1	3
19	1	3
19	1	3
19	1	3
19	1	3
19	1	3
19	1	3
19	1	3
19	1	3
19	1	3
19	1	3
19	1	3
19	1	3
19	1	3
19	1	3
19	1	3
19	1	3
19	1	3
19	1	3
19	1	3
19	1	3
19	1	3
19	1	3
19	1	3
19	1	3
19	1	3
19	1	3
19	1	3
19	1	3
19	1	3
19	1	3
19	1	3
19	1	3
19	1	3
19	1	3
19	1	3
19	1	3
19	1	3
19	1	3
19	1	3
19	1	3
19	1	3
19	1	3
19	1	3
19	1	3
19	1	3
19	1	3
19	1	3
19	1	3
19	1	3
19	1	3
19	1	3
19	1	3
19	1	3
19	1	3
19	1	3
19	1	3
20	1	3
20	1	3
20	1	3
20	1	3
20	1	3
20	1	3
20	1	3
20	1	3
20	1	3
20	1	3
20	1	3
20	1	3
20	1	3
20	1	3
20	1	3
20	1	3
20	1	3
20	1	3
20	1	3
20	1	3
20	1	3
20	1	3
20	1	3
20	1	3
20	1	3
20	1	3
20	1	3
20	1	3
20	1	3
20	1	3
20	1	3
20	1	3
20	1	3
20	1	3
20	1	3
20	1	3
20	1	3
20	1	3
20	1	3
20	1	3
20	1	3
20	1	3
20	1	3
20	1	3
20	1	3
20	1	3
20	1	3
20	1	3
20	1	3
20	1	3
20	1	3
20	1	3
20	1	3
20	1	3
20	1	3
20	1	3
20	1	3
20	1	3
20	1	3
20	1	3
20	1	3
20	1	3
20	1	3
21	1	3
21	1	3
21	1	3
21	1	3
21	1	3
21	1	3
21	1	3
21	1	3
21	1	3
21	1	3
21	1	3
22	1	3
22	1	3
22	1	3
22	1	3
22	1	3
22	1	3
22	1	3
22	1	3
22	1	3
23	1	3
23	1	3
23	1	3
23	1	3
25	1	3
26	1	3
27	1	3
27	1	3
28	1	3
28	1	3
28	1	3
28	1	3
28	1	3
28	1	3
28	1	3
28	1	3
28	1	3
28	1	3
29	1	3
29	1	3
29	1	3
29	1	3
29	1	3
29	1	3
29	1	3
29	1	3
29	1	3
30	1	3
30	1	3
30	1	3
30	1	3
31	1	3
31	1	3
31	1	3
31	1	3
31	1	3
31	1	3
32	1	3
32	1	3
32	1	3
32	1	3
32	1	3
32	1	3
32	1	3
32	1	3
33	1	3
33	1	3
33	1	3
33	1	3
33	1	3
33	1	3
33	1	3
33	1	3
17	2	1
17	2	1
18	2	1
18	2	1
18	2	1
18	2	1
18	2	1
18	2	1
18	2	1
18	2	1
18	2	1
18	2	1
18	2	1
18	2	1
18	2	1
18	2	1
18	2	1
18	2	1
18	2	1
18	2	1
18	2	1
18	2	1
18	2	1
18	2	1
18	2	1
18	2	1
18	2	1
18	2	1
18	2	1
18	2	1
18	2	1
18	2	1
18	2	1
19	2	1
19	2	1
19	2	1
19	2	1
19	2	1
19	2	1
19	2	1
19	2	1
19	2	1
19	2	1
19	2	1
19	2	1
19	2	1
19	2	1
19	2	1
19	2	1
19	2	1
19	2	1
19	2	1
19	2	1
19	2	1
19	2	1
19	2	1
19	2	1
19	2	1
19	2	1
19	2	1
19	2	1
19	2	1
19	2	1
19	2	1
19	2	1
19	2	1
19	2	1
19	2	1
19	2	1
19	2	1
19	2	1
19	2	1
19	2	1
19	2	1
19	2	1
19	2	1
19	2	1
19	2	1
19	2	1
19	2	1
19	2	1
19	2	1
19	2	1
19	2	1
19	2	1
19	2	1
19	2	1
19	2	1
19	2	1
19	2	1
19	2	1
19	2	1
19	2	1
19	2	1
19	2	1
19	2	1
19	2	1
19	2	1
19	2	1
19	2	1
19	2	1
19	2	1
19	2	1
19	2	1
19	2	1
19	2	1
20	2	1
20	2	1
20	2	1
20	2	1
20	2	1
20	2	1
20	2	1
20	2	1
20	2	1
20	2	1
20	2	1
20	2	1
20	2	1
20	2	1
20	2	1
20	2	1
20	2	1
20	2	1
20	2	1
20	2	1
20	2	1
20	2	1
20	2	1
20	2	1
20	2	1
20	2	1
20	2	1
20	2	1
20	2	1
20	2	1
20	2	1
20	2	1
20	2	1
20	2	1
20	2	1
20	2	1
20	2	1
20	2	1
20	2	1
20	2	1
20	2	1
21	2	1
21	2	1
21	2	1
21	2	1
21	2	1
21	2	1
21	2	1
21	2	1
21	2	1
21	2	1
21	2	1
21	2	1
21	2	1
21	2	1
21	2	1
21	2	1
21	2	1
21	2	1
21	2	1
21	2	1
21	2	1
21	2	1
21	2	1
21	2	1
21	2	1
21	2	1
22	2	1
22	2	1
22	2	1
22	2	1
22	2	1
22	2	1
22	2	1
22	2	1
22	2	1
22	2	1
22	2	1
22	2	1
22	2	1
22	2	1
22	2	1
22	2	1
22	2	1
22	2	1
22	2	1
22	2	1
22	2	1
22	2	1
22	2	1
22	2	1
22	2	1
22	2	1
22	2	1
22	2	1
22	2	1
22	2	1
22	2	1
23	2	1
23	2	1
24	2	1
24	2	1
24	2	1
24	2	1
24	2	1
24	2	1
24	2	1
24	2	1
24	2	1
24	2	1
25	2	1
25	2	1
25	2	1
25	2	1
26	2	1
26	2	1
26	2	1
26	2	1
26	2	1
27	2	1
27	2	1
27	2	1
27	2	1
27	2	1
27	2	1
27	2	1
28	2	1
28	2	1
28	2	1
28	2	1
28	2	1
28	2	1
28	2	1
29	2	1
29	2	1
29	2	1
29	2	1
29	2	1
29	2	1
29	2	1
29	2	1
30	2	1
30	2	1
30	2	1
31	2	1
31	2	1
31	2	1
32	2	1
32	2	1
32	2	1
32	2	1
32	2	1
32	2	1
33	2	1
33	2	1
33	2	1
33	2	1
33	2	1
33	2	1
33	2	1
33	2	1
33	2	1
33	2	1
33	2	1
33	2	1
33	2	1
33	2	1
33	2	1
33	2	1
33	2	1
33	2	1
33	2	1
33	2	1
33	2	1
33	2	1
33	2	1
33	2	1
33	2	1
33	2	1
33	2	1
33	2	1
33	2	1
17	2	2
17	2	2
17	2	2
17	2	2
18	2	2
18	2	2
18	2	2
18	2	2
18	2	2
18	2	2
18	2	2
18	2	2
18	2	2
18	2	2
18	2	2
18	2	2
18	2	2
18	2	2
18	2	2
18	2	2
18	2	2
18	2	2
18	2	2
18	2	2
18	2	2
18	2	2
18	2	2
18	2	2
18	2	2
18	2	2
18	2	2
18	2	2
18	2	2
18	2	2
18	2	2
18	2	2
18	2	2
18	2	2
18	2	2
18	2	2
18	2	2
18	2	2
18	2	2
18	2	2
18	2	2
18	2	2
19	2	2
19	2	2
19	2	2
19	2	2
19	2	2
19	2	2
19	2	2
19	2	2
19	2	2
19	2	2
19	2	2
19	2	2
19	2	2
19	2	2
19	2	2
19	2	2
19	2	2
19	2	2
19	2	2
19	2	2
19	2	2
19	2	2
19	2	2
19	2	2
19	2	2
19	2	2
19	2	2
19	2	2
19	2	2
19	2	2
19	2	2
19	2	2
19	2	2
19	2	2
19	2	2
19	2	2
19	2	2
20	2	2
20	2	2
20	2	2
20	2	2
20	2	2
20	2	2
20	2	2
20	2	2
20	2	2
20	2	2
20	2	2
20	2	2
20	2	2
20	2	2
20	2	2
20	2	2
20	2	2
20	2	2
20	2	2
20	2	2
20	2	2
20	2	2
20	2	2
20	2	2
20	2	2
20	2	2
20	2	2
20	2	2
20	2	2
20	2	2
20	2	2
20	2	2
20	2	2
20	2	2
20	2	2
20	2	2
20	2	2
20	2	2
20	2	2
20	2	2
20	2	2
20	2	2
20	2	2
20	2	2
21	2	2
21	2	2
21	2	2
21	2	2
21	2	2
21	2	2
21	2	2
21	2	2
21	2	2
21	2	2
21	2	2
21	2	2
21	2	2
21	2	2
21	2	2
21	2	2
21	2	2
21	2	2
21	2	2
21	2	2
21	2	2
21	2	2
21	2	2
21	2	2
21	2	2
21	2	2
21	2	2
21	2	2
21	2	2
21	2	2
21	2	2
21	2	2
21	2	2
22	2	2
22	2	2
22	2	2
22	2	2
22	2	2
22	2	2
22	2	2
22	2	2
22	2	2
22	2	2
22	2	2
22	2	2
22	2	2
22	2	2
22	2	2
22	2	2
22	2	2
22	2	2
22	2	2
22	2	2
22	2	2
23	2	2
23	2	2
23	2	2
23	2	2
23	2	2
23	2	2
23	2	2
24	2	2
24	2	2
24	2	2
24	2	2
24	2	2
24	2	2
24	2	2
24	2	2
24	2	2
24	2	2
24	2	2
24	2	2
24	2	2
24	2	2
24	2	2
24	2	2
24	2	2
25	2	2
25	2	2
26	2	2
26	2	2
26	2	2
26	2	2
26	2	2
26	2	2
26	2	2
26	2	2
26	2	2
26	2	2
26	2	2
26	2	2
26	2	2
27	2	2
27	2	2
27	2	2
27	2	2
27	2	2
27	2	2
27	2	2
27	2	2
27	2	2
27	2	2
27	2	2
27	2	2
27	2	2
28	2	2
28	2	2
28	2	2
28	2	2
28	2	2
28	2	2
28	2	2
28	2	2
28	2	2
28	2	2
29	2	2
29	2	2
30	2	2
30	2	2
30	2	2
30	2	2
30	2	2
30	2	2
30	2	2
30	2	2
30	2	2
30	2	2
31	2	2
31	2	2
31	2	2
31	2	2
31	2	2
32	2	2
32	2	2
32	2	2
32	2	2
32	2	2
33	2	2
33	2	2
33	2	2
33	2	2
33	2	2
33	2	2
33	2	2
33	2	2
33	2	2
33	2	2
33	2	2
33	2	2
33	2	2
33	2	2
33	2	2
33	2	2
33	2	2
33	2	2
33	2	2
33	2	2
33	2	2
33	2	2
33	2	2
33	2	2
33	2	2
33	2	2
17	2	3
17	2	3
17	2	3
17	2	3
17	2	3
17	2	3
18	2	3
18	2	3
18	2	3
18	2	3
18	2	3
18	2	3
18	2	3
18	2	3
18	2	3
18	2	3
18	2	3
18	2	3
18	2	3
18	2	3
18	2	3
18	2	3
18	2	3
18	2	3
18	2	3
18	2	3
18	2	3
18	2	3
18	2	3
18	2	3
18	2	3
18	2	3
18	2	3
18	2	3
18	2	3
18	2	3
18	2	3
18	2	3
18	2	3
18	2	3
18	2	3
18	2	3
18	2	3
18	2	3
18	2	3
18	2	3
18	2	3
18	2	3
18	2	3
18	2	3
18	2	3
18	2	3
18	2	3
18	2	3
18	2	3
18	2	3
18	2	3
18	2	3
18	2	3
18	2	3
18	2	3
18	2	3
18	2	3
18	2	3
18	2	3
18	2	3
18	2	3
18	2	3
18	2	3
18	2	3
18	2	3
18	2	3
18	2	3
18	2	3
18	2	3
18	2	3
18	2	3
18	2	3
18	2	3
18	2	3
18	2	3
19	2	3
19	2	3
19	2	3
19	2	3
19	2	3
19	2	3
19	2	3
19	2	3
19	2	3
19	2	3
19	2	3
19	2	3
19	2	3
19	2	3
19	2	3
19	2	3
19	2	3
19	2	3
19	2	3
19	2	3
19	2	3
19	2	3
19	2	3
19	2	3
19	2	3
19	2	3
19	2	3
19	2	3
19	2	3
19	2	3
19	2	3
19	2	3
19	2	3
19	2	3
19	2	3
19	2	3
19	2	3
19	2	3
19	2	3
19	2	3
19	2	3
19	2	3
19	2	3
19	2	3
19	2	3
19	2	3
19	2	3
19	2	3
19	2	3
19	2	3
19	2	3
19	2	3
19	2	3
20	2	3
20	2	3
20	2	3
20	2	3
20	2	3
20	2	3
20	2	3
20	2	3
20	2	3
20	2	3
20	2	3
20	2	3
20	2	3
20	2	3
20	2	3
20	2	3
20	2	3
20	2	3
20	2	3
20	2	3
20	2	3
20	2	3
20	2	3
20	2	3
20	2	3
20	2	3
20	2	3
20	2	3
20	2	3
20	2	3
20	2	3
20	2	3
20	2	3
20	2	3
20	2	3
20	2	3
20	2	3
20	2	3
20	2	3
21	2	3
21	2	3
21	2	3
21	2	3
21	2	3
21	2	3
21	2	3
21	2	3
21	2	3
21	2	3
21	2	3
21	2	3
21	2	3
21	2	3
21	2	3
21	2	3
21	2	3
21	2	3
21	2	3
21	2	3
21	2	3
21	2	3
21	2	3
21	2	3
21	2	3
21	2	3
21	2	3
21	2	3
21	2	3
21	2	3
21	2	3
21	2	3
21	2	3
21	2	3
21	2	3
21	2	3
21	2	3
21	2	3
21	2	3
21	2	3
21	2	3
21	2	3
21	2	3
21	2	3
21	2	3
21	2	3
21	2	3
21	2	3
21	2	3
21	2	3
21	2	3
21	2	3
21	2	3
21	2	3
21	2	3
21	2	3
22	2	3
22	2	3
22	2	3
22	2	3
22	2	3
22	2	3
22	2	3
22	2	3
22	2	3
22	2	3
22	2	3
22	2	3
22	2	3
23	2	3
23	2	3
23	2	3
23	2	3
23	2	3
23	2	3
23	2	3
23	2	3
23	2	3
23	2	3
23	2	3
23	2	3
23	2	3
23	2	3
23	2	3
23	2	3
23	2	3
23	2	3
23	2	3
24	2	3
24	2	3
24	2	3
26	2	3
26	2	3
26	2	3
26	2	3
27	2	3
27	2	3
27	2	3
28	2	3
28	2	3
28	2	3
29	2	3
29	2	3
29	2	3
30	2	3
30	2	3
30	2	3
30	2	3
30	2	3
31	2	3
31	2	3
31	2	3
31	2	3
31	2	3
31	2	3
32	2	3
32	2	3
32	2	3
32	2	3
32	2	3
32	2	3
32	2	3
32	2	3
33	2	3
33	2	3
33	2	3
33	2	3
17	3	1
17	3	1
17	3	1
17	3	1
17	3	1
17	3	1
17	3	1
18	3	1
18	3	1
18	3	1
18	3	1
18	3	1
18	3	1
18	3	1
18	3	1
18	3	1
18	3	1
18	3	1
19	3	1
19	3	1
19	3	1
19	3	1
19	3	1
19	3	1
19	3	1
19	3	1
19	3	1
19	3	1
19	3	1
19	3	1
19	3	1
19	3	1
19	3	1
19	3	1
19	3	1
19	3	1
19	3	1
19	3	1
19	3	1
19	3	1
20	3	1
20	3	1
20	3	1
20	3	1
20	3	1
20	3	1
20	3	1
20	3	1
20	3	1
20	3	1
20	3	1
20	3	1
20	3	1
20	3	1
20	3	1
20	3	1
20	3	1
20	3	1
20	3	1
20	3	1
20	3	1
20	3	1
20	3	1
20	3	1
20	3	1
20	3	1
20	3	1
20	3	1
20	3	1
20	3	1
20	3	1
20	3	1
20	3	1
20	3	1
20	3	1
20	3	1
20	3	1
20	3	1
20	3	1
20	3	1
20	3	1
20	3	1
20	3	1
20	3	1
20	3	1
20	3	1
20	3	1
20	3	1
21	3	1
21	3	1
21	3	1
21	3	1
21	3	1
21	3	1
21	3	1
21	3	1
21	3	1
21	3	1
21	3	1
21	3	1
21	3	1
21	3	1
21	3	1
21	3	1
21	3	1
21	3	1
21	3	1
21	3	1
21	3	1
21	3	1
21	3	1
21	3	1
21	3	1
21	3	1
21	3	1
21	3	1
21	3	1
22	3	1
22	3	1
22	3	1
22	3	1
22	3	1
22	3	1
22	3	1
22	3	1
22	3	1
22	3	1
22	3	1
22	3	1
22	3	1
22	3	1
22	3	1
22	3	1
22	3	1
22	3	1
22	3	1
22	3	1
22	3	1
22	3	1
22	3	1
22	3	1
22	3	1
22	3	1
23	3	1
23	3	1
23	3	1
23	3	1
23	3	1
23	3	1
23	3	1
23	3	1
23	3	1
23	3	1
23	3	1
23	3	1
23	3	1
23	3	1
23	3	1
23	3	1
23	3	1
23	3	1
24	3	1
24	3	1
24	3	1
24	3	1
24	3	1
24	3	1
24	3	1
25	3	1
26	3	1
26	3	1
27	3	1
27	3	1
27	3	1
27	3	1
27	3	1
27	3	1
27	3	1
27	3	1
27	3	1
27	3	1
27	3	1
27	3	1
27	3	1
27	3	1
27	3	1
27	3	1
27	3	1
27	3	1
27	3	1
27	3	1
27	3	1
28	3	1
28	3	1
28	3	1
28	3	1
28	3	1
28	3	1
28	3	1
28	3	1
28	3	1
28	3	1
29	3	1
29	3	1
29	3	1
29	3	1
29	3	1
29	3	1
29	3	1
29	3	1
29	3	1
29	3	1
29	3	1
30	3	1
30	3	1
30	3	1
31	3	1
31	3	1
31	3	1
31	3	1
32	3	1
32	3	1
32	3	1
32	3	1
32	3	1
32	3	1
32	3	1
33	3	1
33	3	1
33	3	1
33	3	1
33	3	1
33	3	1
33	3	1
33	3	1
33	3	1
33	3	1
33	3	1
33	3	1
33	3	1
33	3	1
33	3	1
33	3	1
33	3	1
33	3	1
33	3	1
33	3	1
33	3	1
33	3	1
33	3	1
33	3	1
33	3	1
33	3	1
33	3	1
33	3	1
33	3	1
33	3	1
33	3	1
33	3	1
33	3	1
33	3	1
33	3	1
33	3	1
33	3	1
33	3	1
33	3	1
33	3	1
33	3	1
33	3	1
33	3	1
33	3	1
33	3	1
33	3	1
33	3	1
33	3	1
33	3	1
33	3	1
33	3	1
33	3	1
33	3	1
33	3	1
33	3	1
33	3	1
33	3	1
33	3	1
33	3	1
33	3	1
33	3	1
33	3	1
33	3	1
33	3	1
33	3	1
33	3	1
33	3	1
33	3	1
33	3	1
33	3	1
33	3	1
33	3	1
33	3	1
16	3	2
17	3	2
17	3	2
17	3	2
17	3	2
17	3	2
17	3	2
17	3	2
17	3	2
17	3	2
18	3	2
18	3	2
18	3	2
18	3	2
18	3	2
18	3	2
18	3	2
[truncated: 8,728 more rows]

## Sheet: FRASS
Treatment	OC %	Total N %	Total P2O5%	Total K2O%	C/N ratio
Control frass	31	2.5	3.93	1.82	12.4
VEG	47.9	2.32	0.82	4.51	20.7
KNF	37	0.54	0.8	1.31	68.5
15% KNF	33.7	1.15	1.65	4.23	29.2
30% KNF	33.4	1.2	1.68	2.96	27.8
KF	31.5	0.82	1.21	2.12	38.4
15% KF	29.8	1.05	1.63	3.74	28.3
30% KF	27.9	1.02	1.43	2.94	27.4
BNF	47.3	0.81	0.74	1.28	58.4
15% BNF	40	1.28	1.47	4.86	31.3
30% BNF	38.3	1.33	1.27	3.8	28.7
BF	44	1.13	1.12	1.6	38.9
15% BF	37.7	1.37	1.62	6.02	27.6
30% BF	37.1	1.26	1.41	3.83	29.4
YNF	51.3	0.75	1.74	0.99	68.5
15% YNF	40	1.28	2.15	4.29	31.3
30% YNF	40.9	1.33	1.92	2.43	30.7
YF	47	0.74	2	0.9	63.5
15% YF	38.8	1.21	2.26	4.1	32
30% YF	39.5	1.23	2.11	2.49	32.2
Standard	-	>1%	>0.5%	>0.5%	<20
